# Supplementary material
Source: ML conference proceedings conference paper supplement (https://aclanthology.org/2022.acl-short.20)

# Entropy of the unigram distribution

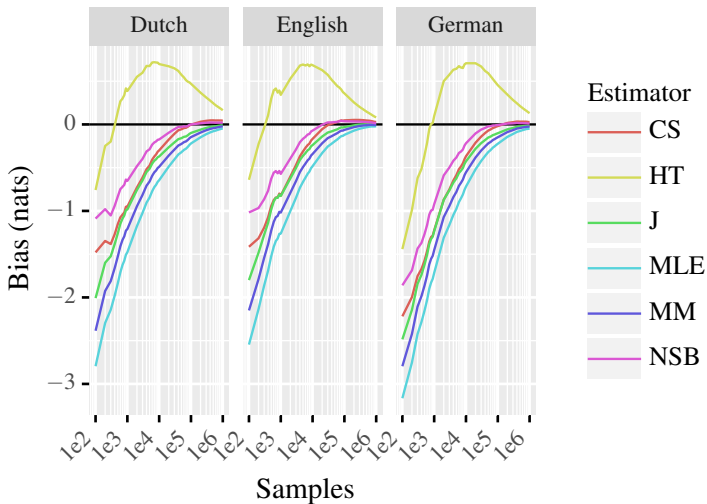

Supplement: software [file celex.pdf › entropy/figures/celex.pdf]

# Entropy on CELEX

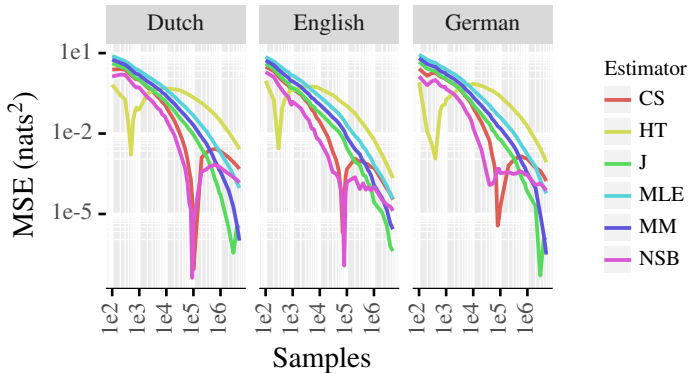

Supplement: software [file celex_mse.pdf › entropy/figures/celex_mse.pdf]

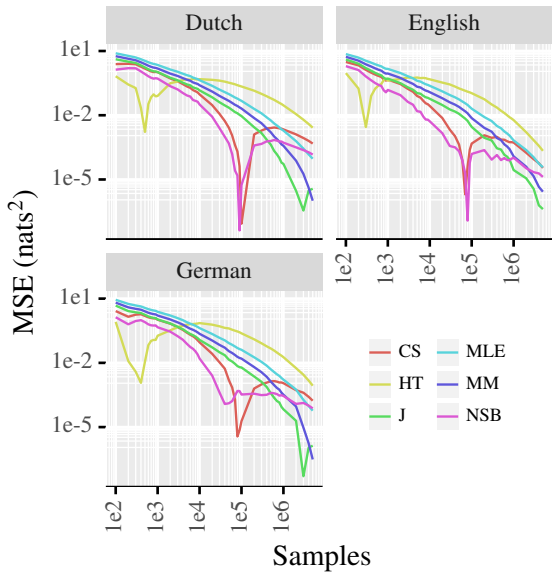

Supplement: software [file celex_mse_big.pdf › entropy/figures/celex_mse_big.pdf]

# Estimator bias

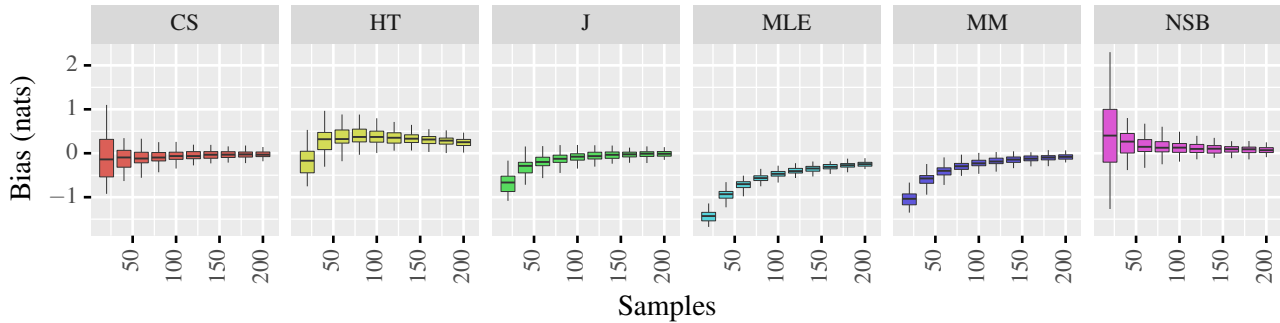

Supplement: software [file estimators.pdf › entropy/figures/estimators.pdf]

# Sample size vs. estimator bias (Symmetric Dirichlet, $K = 100$ )

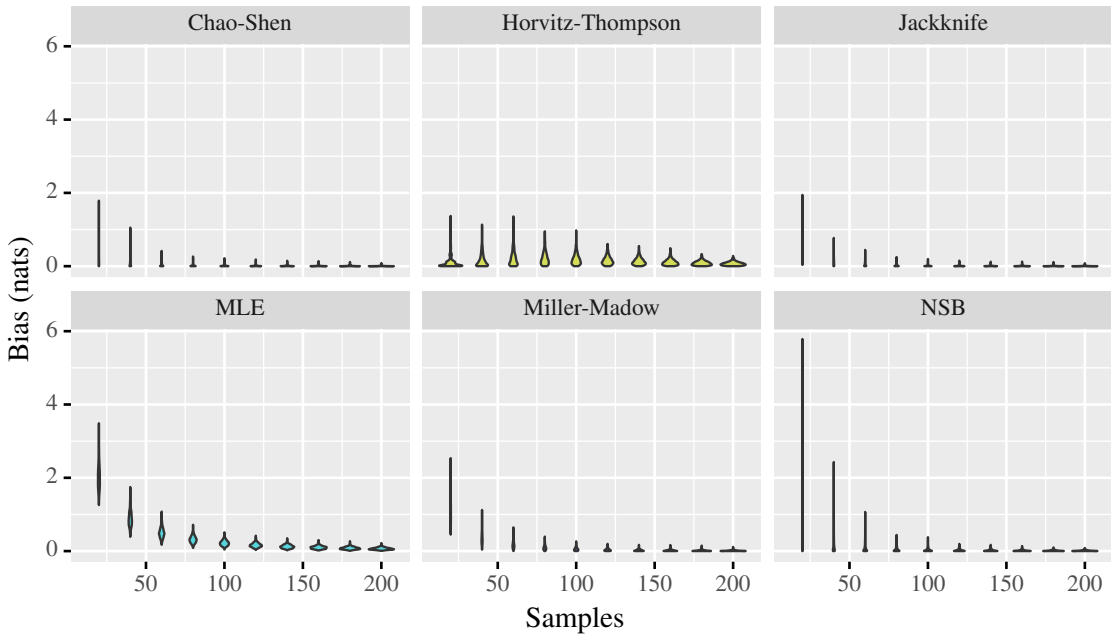

Supplement: software [file estimators_rmse.pdf › entropy/figures/estimators_rmse.pdf]

# Sample size vs. estimator bias (Zipfian, $K = 100$ )

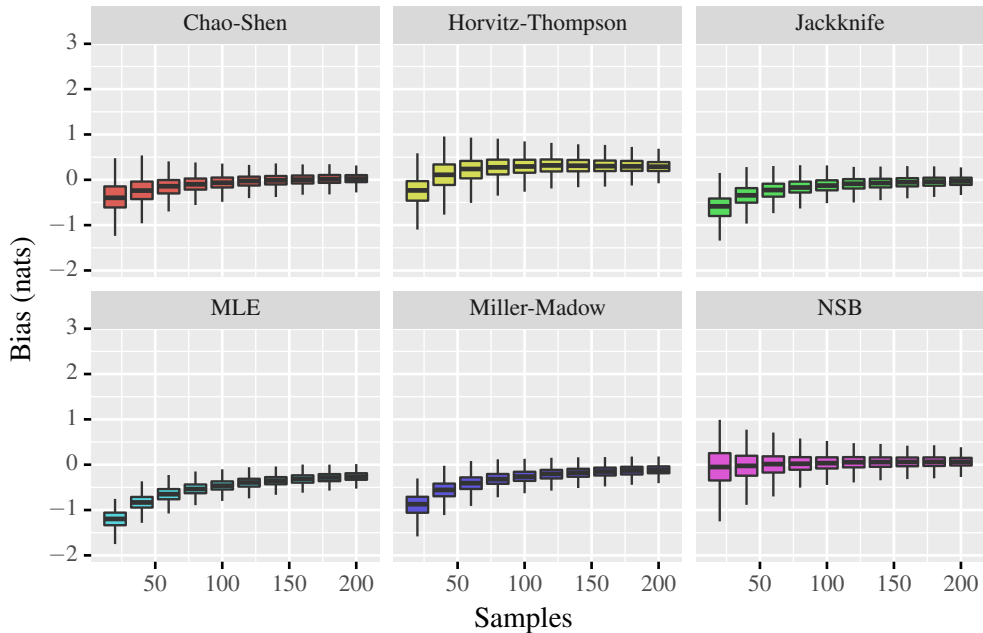

Supplement: software [file estimators_zipf.pdf › entropy/figures/estimators_zipf.pdf]

Pairwise MAB p-values (Dirichlet)

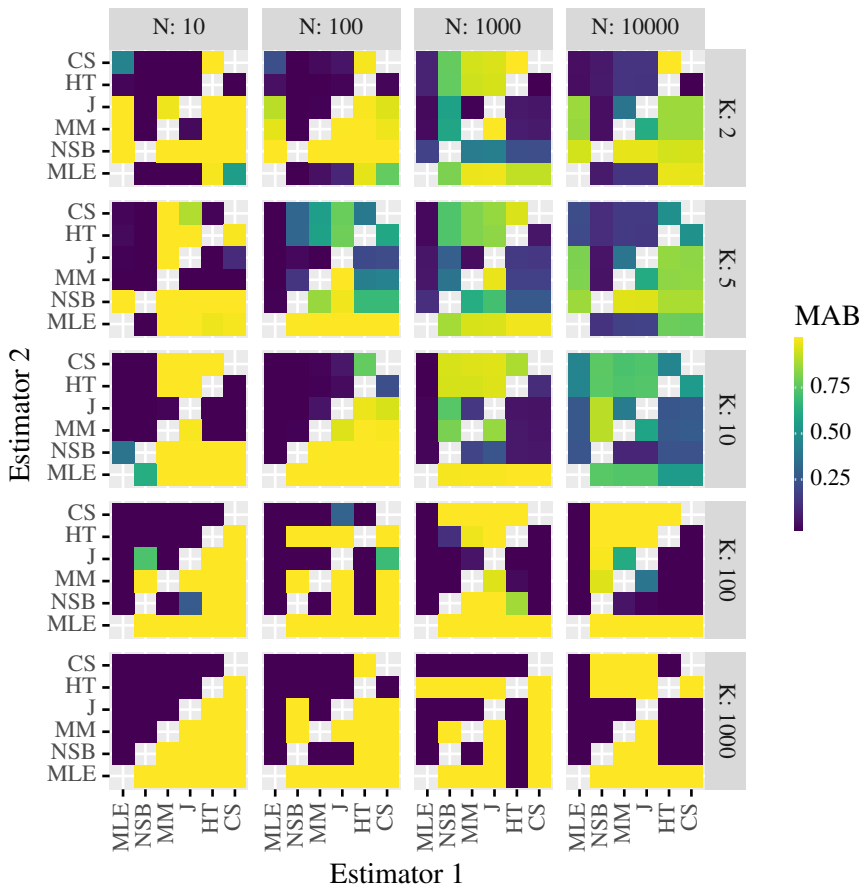

Supplement: software [file mab.pdf › entropy/figures/mab.pdf]

# Mutual information of gender partitions

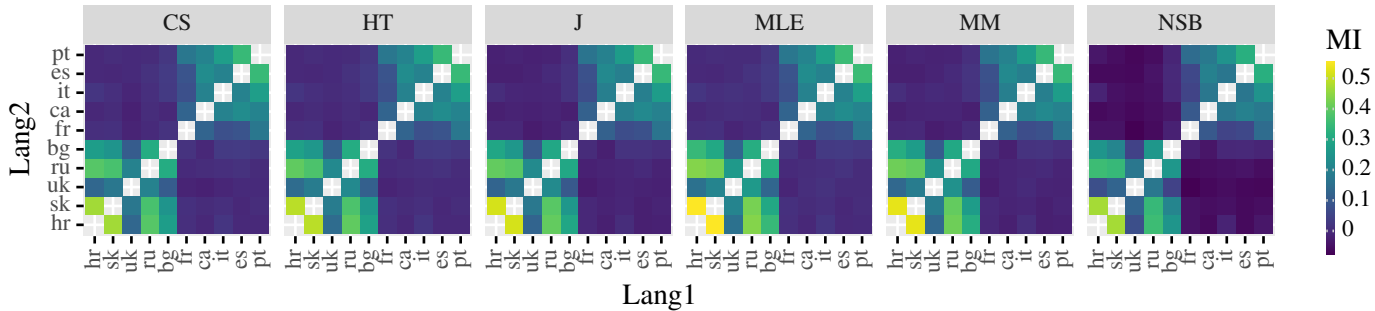

Supplement: software [file mccarthy.pdf › entropy/figures/mccarthy.pdf]

# Sample size vs. estimator bias (Zipfian, $K = 100$ )

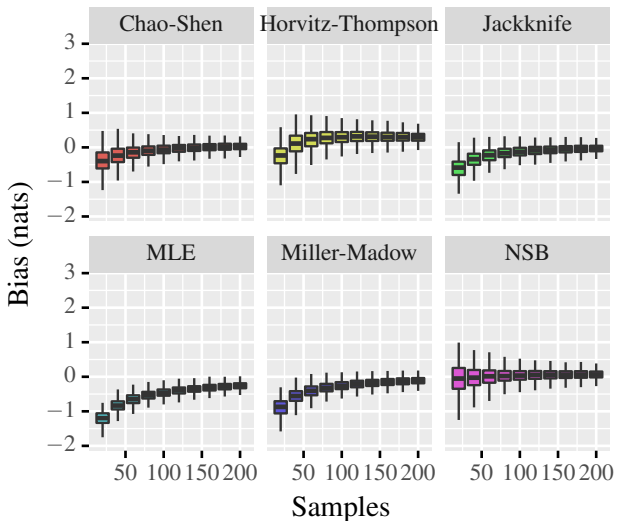

Supplement: software [file mle_bias.pdf › entropy/figures/mle_bias.pdf]

# Pairwise MSE p-values (Dirichlet)

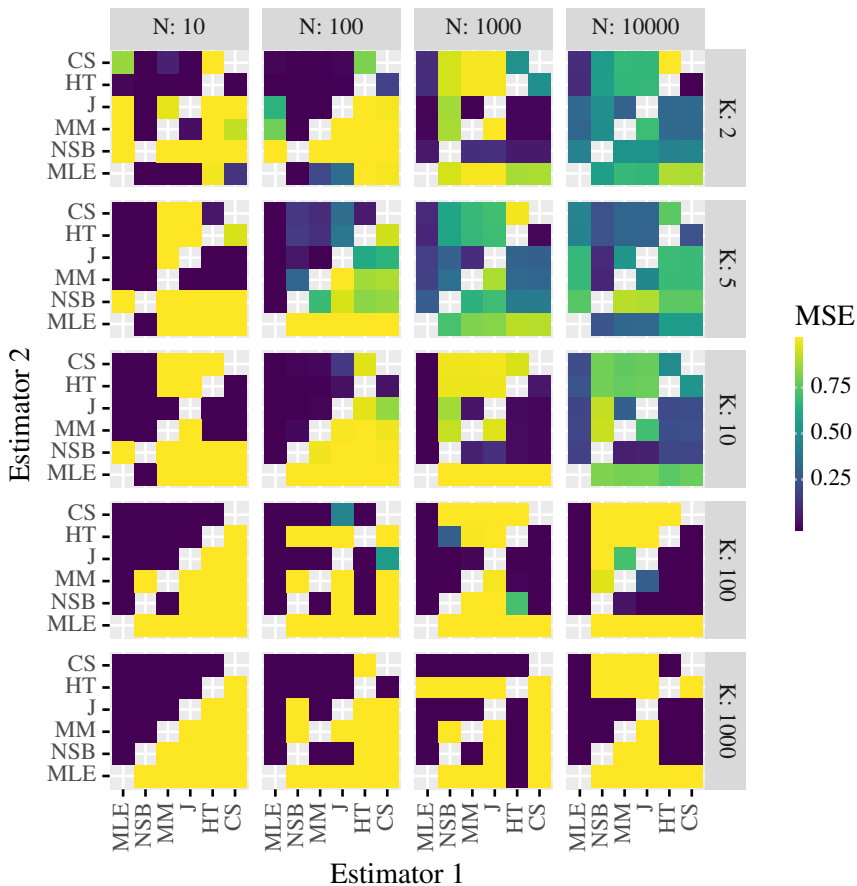

Supplement: software [file mse.pdf › entropy/figures/mse.pdf]

# MLE bias (Symmetric Dirichlet, $K = 100$ )

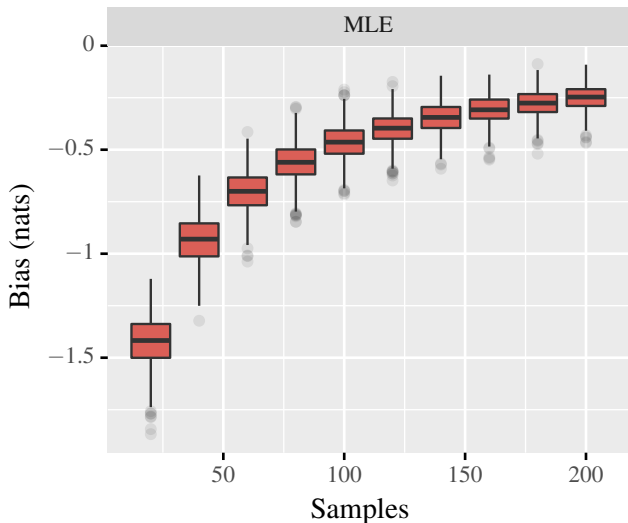

Supplement: software [file mle_bias.pdf › entropy/mle_bias.pdf]
